# Supplementary material
Source: PubMed Central journal article supplement (PMC6172472)
Supplement: EMBR-19-e45770-s001.pdf [file EMBR-19-e45770-s001.pdf]

## **APPENDIX**

for

Functional interplay between c-Myc and Max in B lymphocyte differentiation

### **TABLE OF CONTENTS**

|                         |   |
|-------------------------|---|
| Appendix Figure S1..... | 1 |
| Appendix Table S1.....  | 2 |

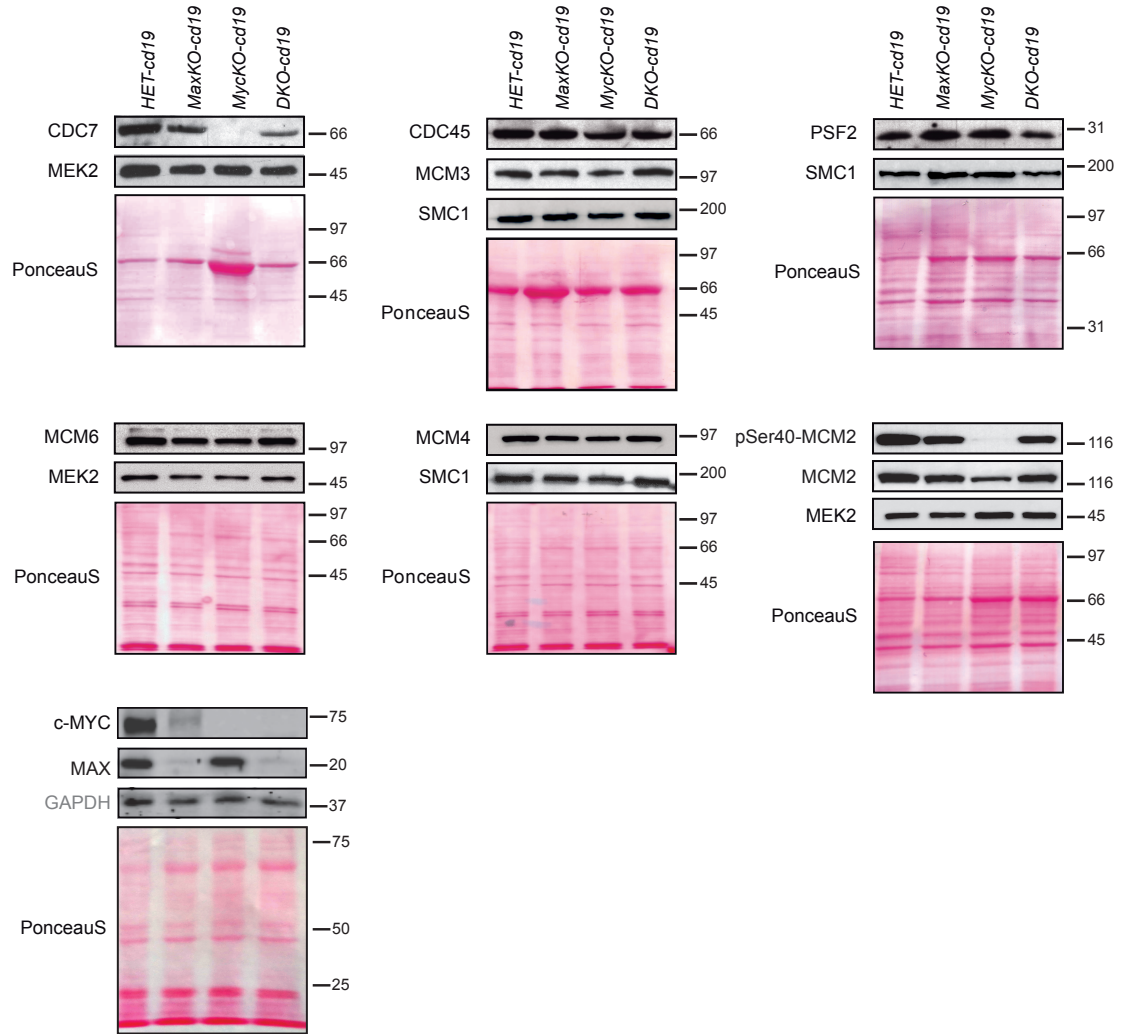

**Appendix Figure S1.** Western blot analyses of DNA replication machinery in primary B lymphocytes. Ponceau S staining corresponding to immunoblots shown in EV1 and Figure 3I.

**Appendix Table S1.** Oligonucleotide primers used in this work

| Target             | Name          | Sense   | Sequence 5'                | Use  |
|--------------------|---------------|---------|----------------------------|------|
| <i>myc</i>         | c-mycFloxS    | Forward | GCCCCTGAATTGCTAGGAAGACTG   | PCR  |
|                    | c-mycFloxA    | Reverse | CCGACCGGGTCCGAGTCCCTATT    |      |
| <i>max</i>         | MaxF9         | Forward | CTATAAGAAAAAATCCAGAGAGGG   | PCR  |
|                    | MaxF10        | Reverse | CCCAAAGTGTCAAGCAACTCACAG   |      |
| <i>myc-deleted</i> | Null S        | Forward | TCGCGCCCCTGAATTGCTAGGAA    | PCR  |
|                    | Null A        | Reverse | TGCCCAGATAGGGAGCTGTGATACTT |      |
| <i>max-deleted</i> | MaxNull_2F    | Forward | TGAGACAAGGCGCATAACGA       | PCR  |
|                    | MaxNull_2R    | Reverse | CCAGGTAAGTCGCTCTTGGT       |      |
| <i>gapdh</i>       | GAPDH 5'      | Forward | CATCACCATCTTCCAGGAGC       | PCR  |
|                    | GAPDH 3'      | Reverse | CATGAGTCCTTCCACGATACC      |      |
| <i>card11</i>      | Card11_1R     | Forward | CCTACAAGAGGAAGTCCGCC       | qPCR |
|                    | Card11_1F     | Reverse | CCAGGTACTTATCCCGCAGC       |      |
| <i>cd72</i>        | CD72_1R       | Forward | CTCCAAACTGGCAGCATTG        | qPCR |
|                    | CD72_1F       | Reverse | CGCTGGGCAGAGAAACTTCA       |      |
| <i>med13i</i>      | Med13l_1R     | Forward | GTGGGGAGATGAACCCAACC       | qPCR |
|                    | Med13l_1F     | Reverse | AGTCCTTCTTCCACAACCTGC      |      |
| <i>ssh2</i>        | SSH2_1R       | Forward | ACAGCCCAGAAGCATCAGC        | qPCR |
|                    | SSH2_1F       | Reverse | AGCCATTCCCTCGTGGTAGA       |      |
| <i>mrpl12</i>      | MRPL12_1R     | Forward | GCAAAGCCTGTGGACAAAGTAA     | qPCR |
|                    | MRPL12_1F     | Reverse | ACCAGCTTCTTGGCCTGGAC       |      |
| <i>rpl39</i>       | RPL39_1R      | Forward | CGGTCCC GGCCCTTICTCT       | qPCR |
|                    | RPL39_1F      | Reverse | GAGAAGACATGGCGAGAAGCC      |      |
| <i>myce2e3</i>     | MycE2E3_1R    | Forward | CAGCGACTCTGAAGAAGAGCA      | qPCR |
|                    | MycE2E3_1F    | Reverse | GACCTCTTGGCAGGGGTTTG       |      |
| <i>max</i>         | Max_1R        | Forward | CTCCAAGGAGAGAAGGCATCC      | qPCR |
|                    | Max_1F        | Reverse | CAATGTCTTGCTGGTGCGTA       |      |
| <i>cdc7</i>        | cdc7_1R       | Forward | CTGACCAGACCACAGCGATT       | qPCR |
|                    | cdc7_1F       | Reverse | AAAATGGGTACCGCCCACTG       |      |
| <i>beta actin</i>  | beta actin_1R | Forward | AAGGAGATTACTTGCTCTGGCTCCTA | qPCR |
|                    | beta actin_1F | Reverse | ACTCATCGTACTCCTGCTTGCTGAT  |      |
