# Supplementary material
Source: PubMed Central journal article supplement (PMC6172472)
Supplement: EMBR-19-e45770-s002.pdf [file EMBR-19-e45770-s002.pdf]

## Expanded View Figures

A

PCR strategy

*max* or *c-myc* deleted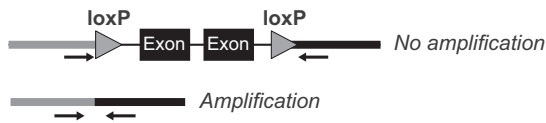*max* or *c-myc* wt /flox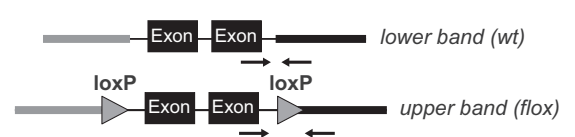

B

Sorted B220<sup>+</sup>GFP<sup>+</sup> Bone Marrow cells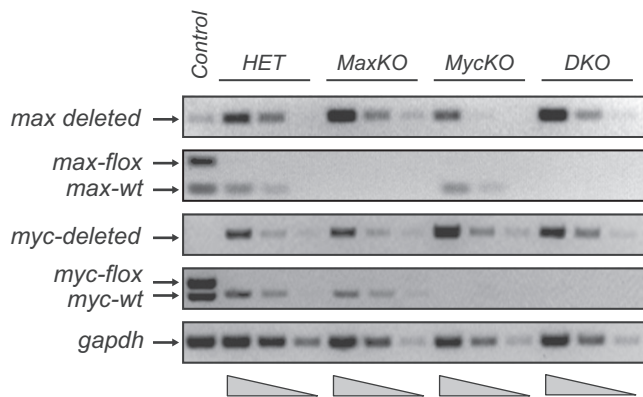Sorted B220<sup>+</sup>GFP<sup>+</sup> Spleen cells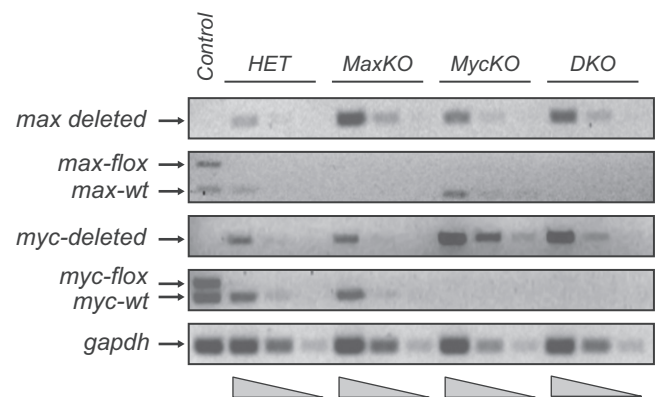

## Mouse Genotypes

HET-*mb1*: *myc*<sup>fl/+</sup>; *max*<sup>fl/+</sup>; *mb1*<sup>cre/+</sup>; *rosa26*<sup>gfp/gfp</sup>MaxKO-*mb1*: *myc*<sup>fl/+</sup>; *max*<sup>fl/fl</sup>; *mb1*<sup>cre/+</sup>; *rosa26*<sup>gfp/gfp</sup>MycKO-*mb1*: *myc*<sup>fl/fl</sup>; *max*<sup>fl/+</sup>; *mb1*<sup>cre/+</sup>; *rosa26*<sup>gfp/gfp</sup>DKO-*mb1*: *myc*<sup>fl/fl</sup>; *max*<sup>fl/fl</sup>; *mb1*<sup>cre/+</sup>; *rosa26*<sup>gfp/gfp</sup>

## Mouse Genotypes

HET-*cd19*: *myc*<sup>fl/+</sup>; *max*<sup>fl/+</sup>; *cd19*<sup>cre/+</sup>; *rosa26*<sup>gfp/gfp</sup>MaxKO-*cd19*: *myc*<sup>fl/+</sup>; *max*<sup>fl/fl</sup>; *cd19*<sup>cre/+</sup>; *rosa26*<sup>gfp/gfp</sup>MycKO-*cd19*: *myc*<sup>fl/fl</sup>; *max*<sup>fl/+</sup>; *cd19*<sup>cre/+</sup>; *rosa26*<sup>gfp/gfp</sup>DKO-*cd19*: *myc*<sup>fl/fl</sup>; *max*<sup>fl/fl</sup>; *cd19*<sup>cre/+</sup>; *rosa26*<sup>gfp/gfp</sup>

C

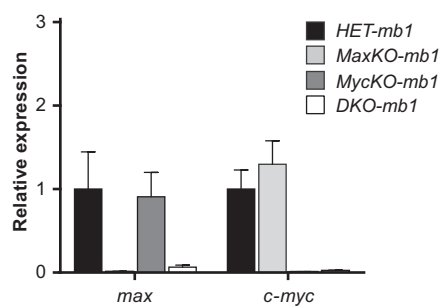

D

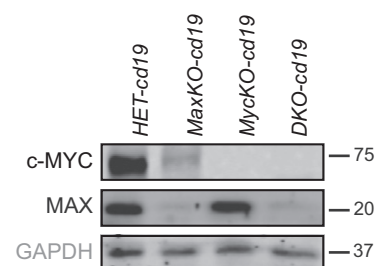

Figure EV1

**Figure EV1. Efficient deletion of *c-myc* and *max* in B lymphocytes from bone marrow and spleen of conditional mice.**

- A PCR strategy to amplify floxed, deleted, and wt alleles of *c-myc* or *max*. For *c-myc*, exons 2 and 3 were flanked by loxP sites and, for *max*, exons 4 and 5.
- B Genomic PCR analysis of *wt*, *deleted*, and *flox* alleles of *c-myc* and *max* from sorted B220<sup>+</sup>GFP<sup>+</sup> bone marrow or spleen lymphocytes of *mb1-cre*- or *cd19-cre*-bearing mice, respectively. *gapdh* was used for normalization. Experiment representative of three independent experiments.
- C RNA expression of *max* and *c-myc* genes from sorted bone marrow GFP<sup>+</sup>B220<sup>+</sup> IgM<sup>+</sup> cells of *HET-mb1*, *MaxKO-mb1*, *MycKO-mb*, and *DKO-mb1* mice. *n* = 3. Error bars are standard deviations.
- D Western blotting of c-Myc and Max in sorted B220<sup>+</sup>IgM<sup>+</sup>GFP<sup>+</sup> lymphocytes. Spleen cells from the indicated mice were sorted and activated with LPS and IL-4 for 3 days before analysis. Experiment representative of three independent experiments.

Source data are available online for this figure.

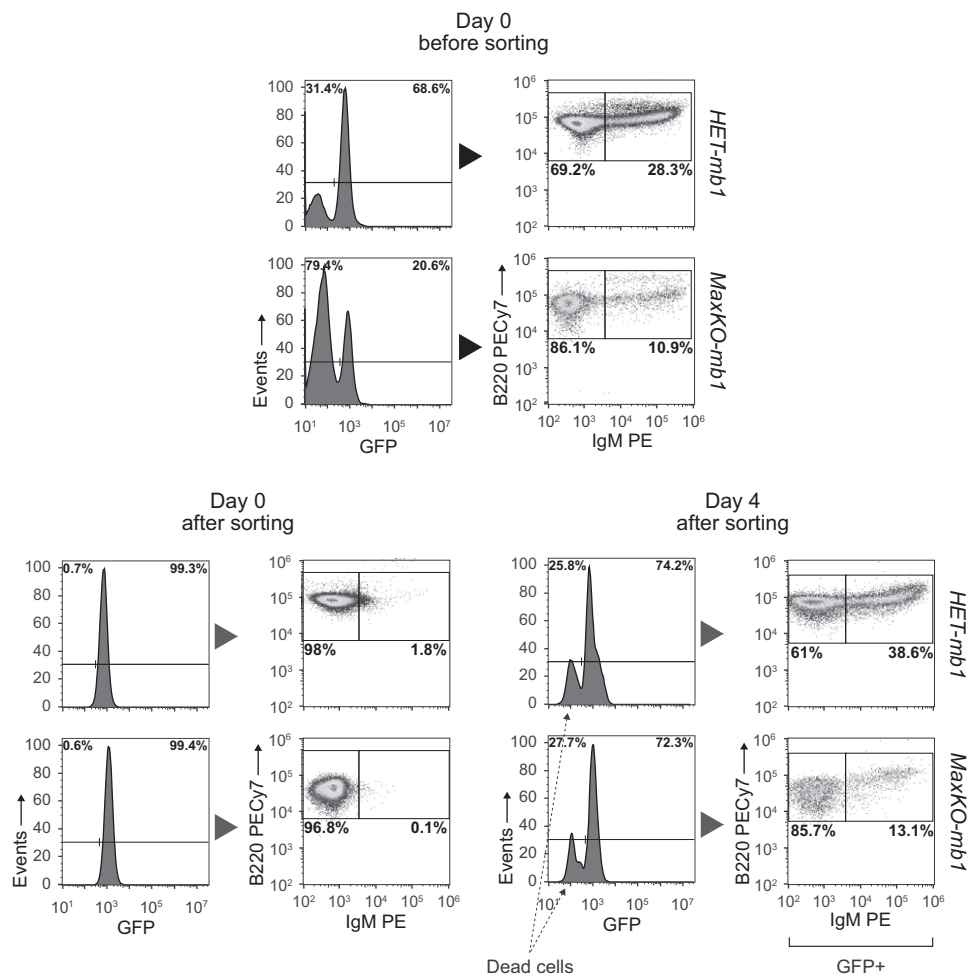**Figure EV2. Max-deficient cells generate B220<sup>+</sup>IgM<sup>+</sup> lymphocytes *in vitro*.**

Sorted GFP<sup>+</sup>B220<sup>+</sup>IgM<sup>-</sup> BM cells from *HET-mb1* and *MaxKO-mb1* mice were cultured with IL-7, rSCF, and rFlt3L and analyzed by flow cytometry 4 days later. For BM analysis, cells were isolated from femora and tibiae and sorted by flow cytometry (GFP<sup>+</sup> cells, purity > 99%) before culture. After 4 days, the generation of GFP<sup>+</sup>B220<sup>+</sup>IgM<sup>+</sup> cells was analyzed. A GFP<sup>-</sup> population corresponding to dead cells is indicated. Experiment representative of at least three independent experiments.

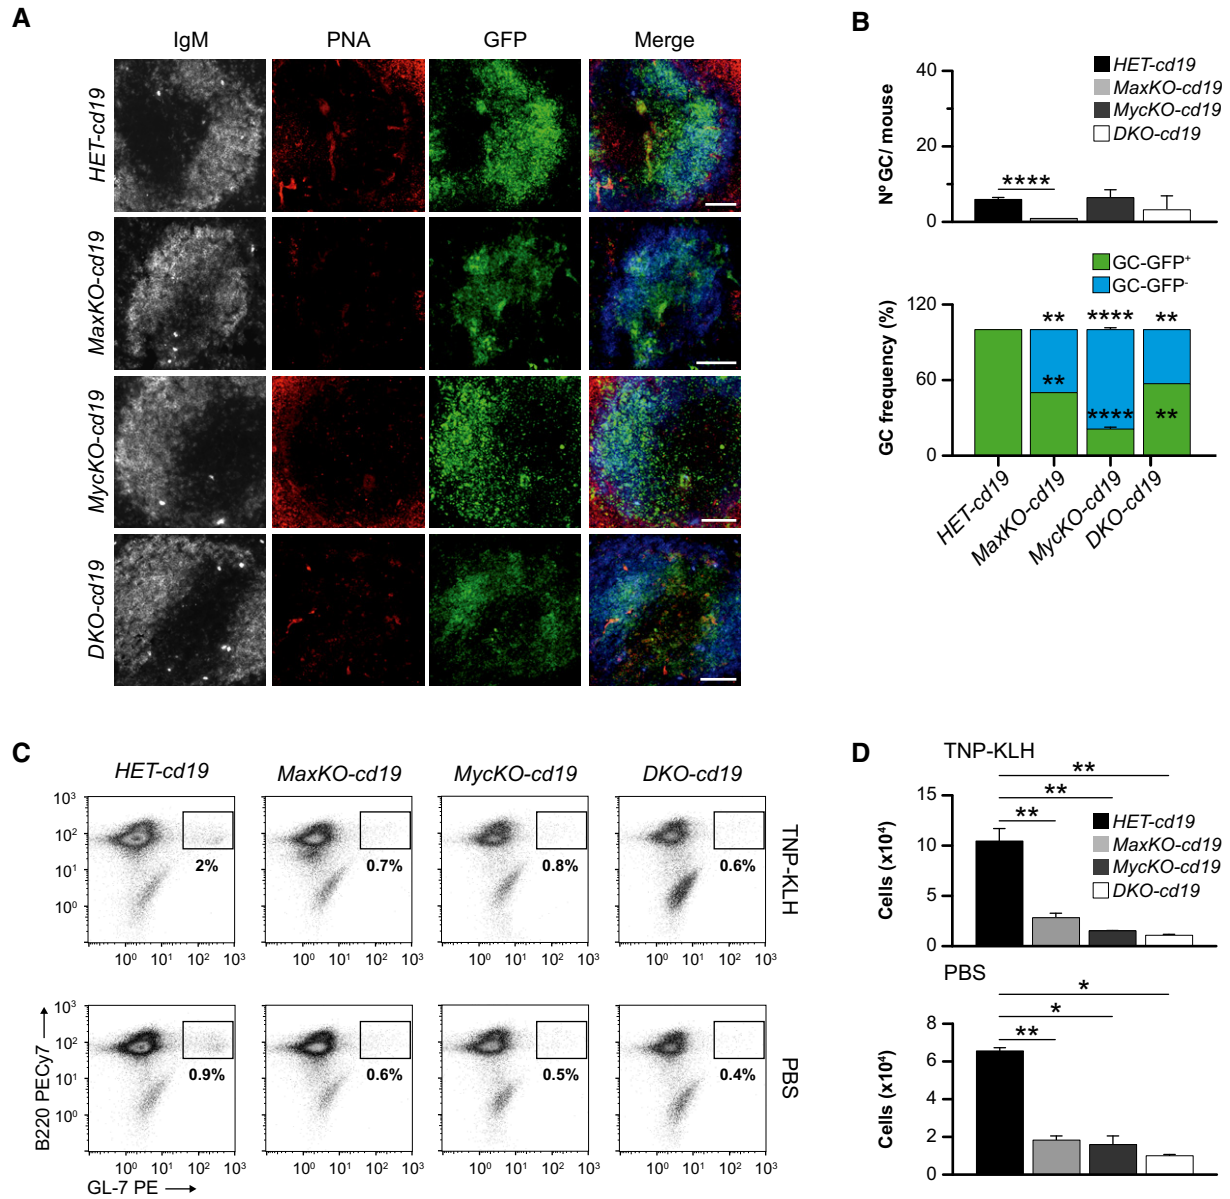

**Figure EV3. Analysis of GC formation in the spleen of *MaxKO-cd19*, *MycKO-cd19*, *DKO-cd19*, and heterozygous control mice upon TNP-KLH and PBS immunization.**

A Representative images of frozen spleen sections stained for IgM (gray/blue), PNA (GC marker; red), and GFP (deleted B cells; green) of mice immunized with PBS. Analysis was performed at 12 days post-immunization. Scale bar, 80  $\mu$ m.

B Upper, number of GCs per mouse in spleen sections of PBS-immunized *MaxKO-cd19* ( $n = 2$  mice,  $n = 84$  follicles analyzed), *MycKO-cd19* ( $n = 2$  mice,  $n = 163$  follicles analyzed), *DKO-cd19* ( $n = 2$  mice,  $n = 157$  follicles analyzed), and heterozygous control mice ( $n = 2$  mice,  $n = 182$  follicles analyzed). Lower, frequencies of GC (PNA<sup>+</sup>) GFP<sup>+</sup> (deleted cells) or GFP<sup>-</sup> (non-deleted cells) in PBS-immunized *MaxKO-cd19* ( $n = 2$  GCs), *MycKO-cd19* ( $n = 14$  GCs), *DKO-cd19* ( $n = 7$  GCs), and heterozygous control ( $n = 13$  GCs) mice at 13 days post-immunization. Error bars are standard deviations.

C Flow cytometry analyses of GC B lymphocytes (GFP<sup>+</sup>B220<sup>+</sup>GL-7<sup>+</sup>) in the spleen of TNP-KLH or PBS-immunized mice. Single-cell suspensions from *MaxKO-cd19*, *MycKO-cd19*, *DKO-cd19*, and heterozygous control mice were prepared, stained, and analyzed ( $n = 3$ ).

D Absolute numbers of GC B cells (GFP<sup>+</sup>B220<sup>+</sup>GL-7<sup>+</sup>) in *MaxKO-cd19*, *MycKO-cd19*, *DKO-cd19*, and heterozygous control mice from (C). Error bars are standard deviations. Data information: Statistical analyses were performed using Student's two-tailed unpaired t-test. \* $P < 0.05$ , \*\* $P < 0.01$ , \*\*\*\* $P < 0.0001$ .

**Figure EV4. RNA-sequencing analyses.**

- A Heatmaps of DEGs (adj.  $P$ -value  $< 0.01$ ) of cell cycle pathways and genes involved in B lymphocyte differentiation. Genes highlighted in red were previously tested by qPCR [22].
- B GO classification of biological process and molecular functions of downregulated (blue) and upregulated (red) genes for all three conditions ( $\pm 1.5$ -FC and  $P < 0.01$ ). The 20 most significantly (FDR  $< 0.05$ , Dataset EV1) affected GO categories are represented.
- C GO and pathways enrichment analysis of 45 downregulated and 49 upregulated genes in MycKO only indicated in Fig 4D. Statistically significant GO categories and KEGG pathways (FDR  $< 0.05$ ) are shown.

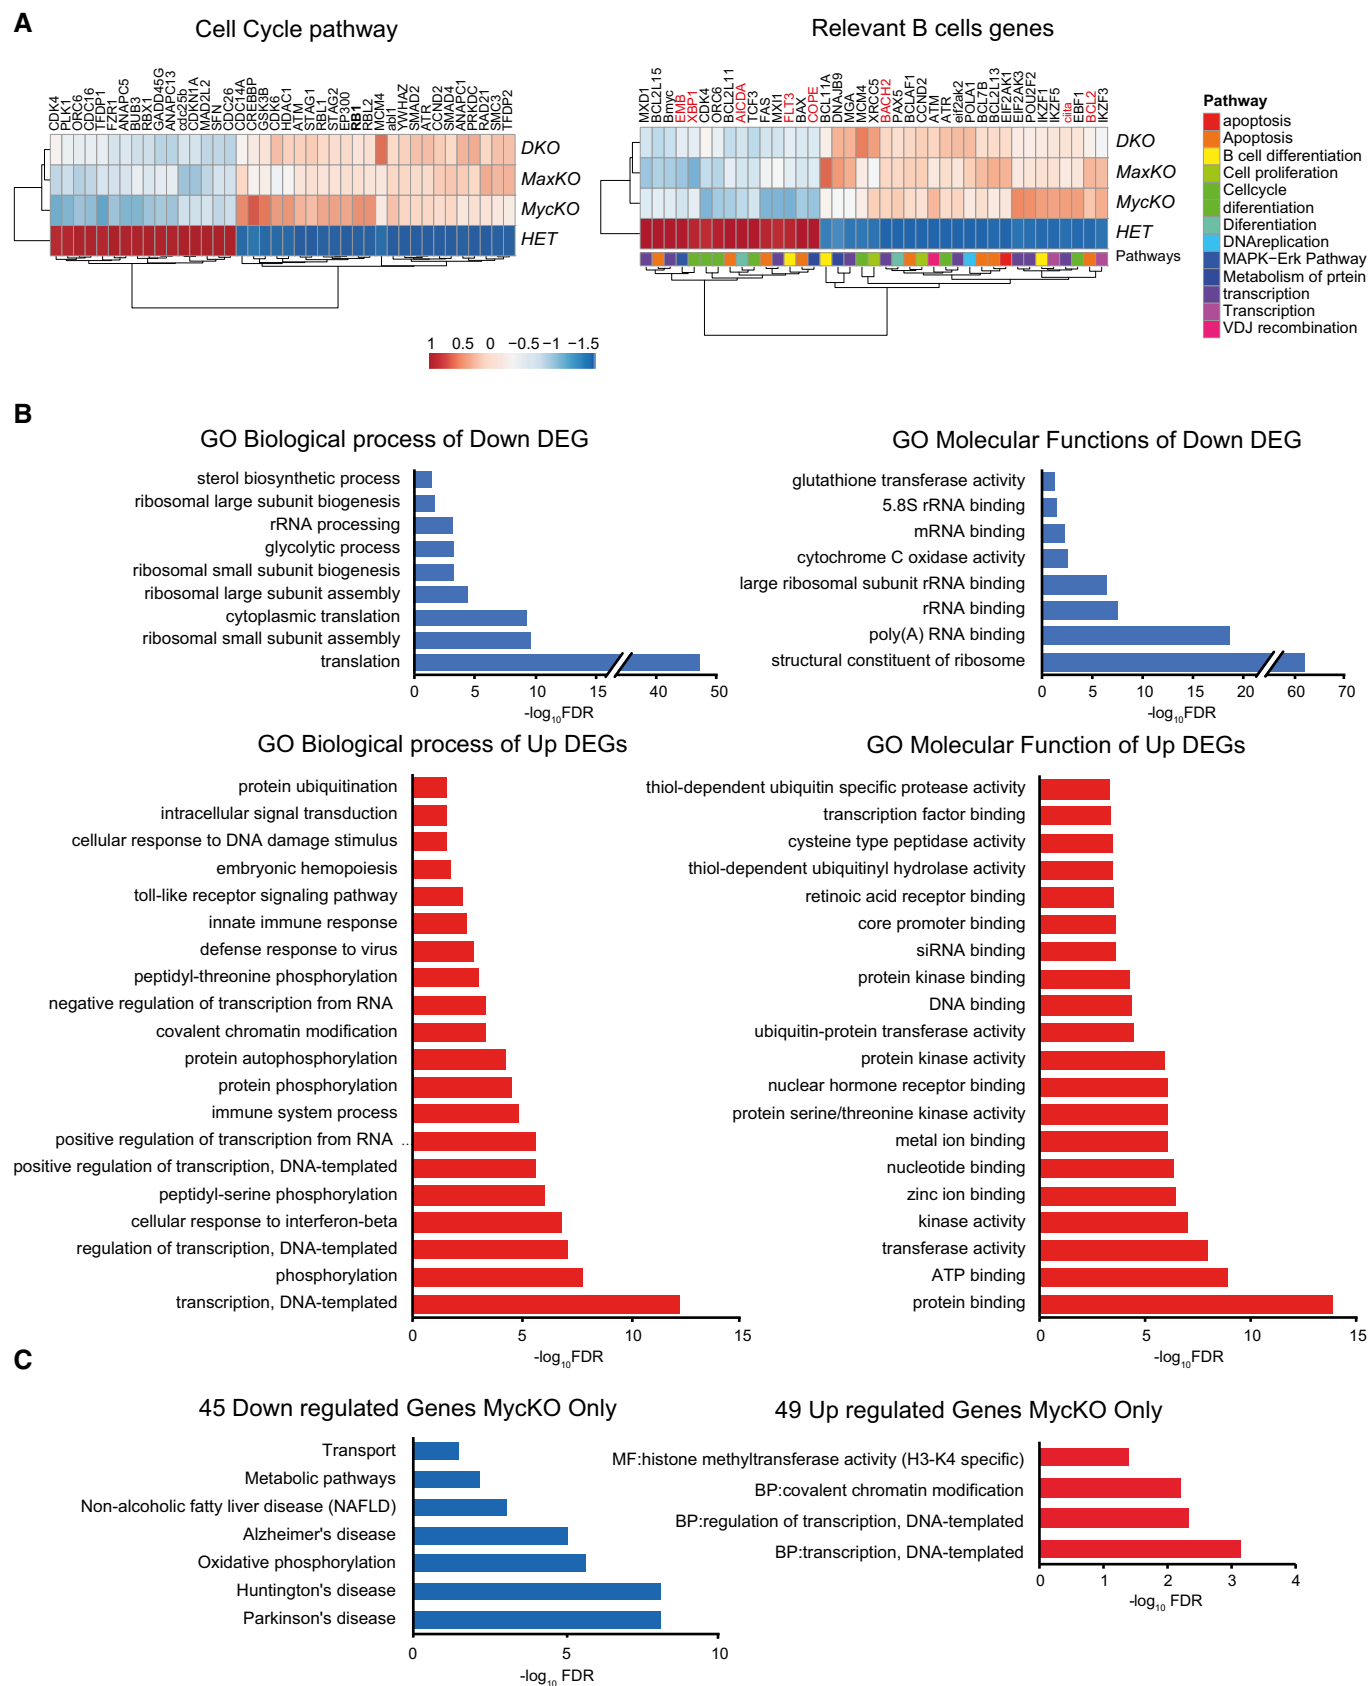

Figure EV4.

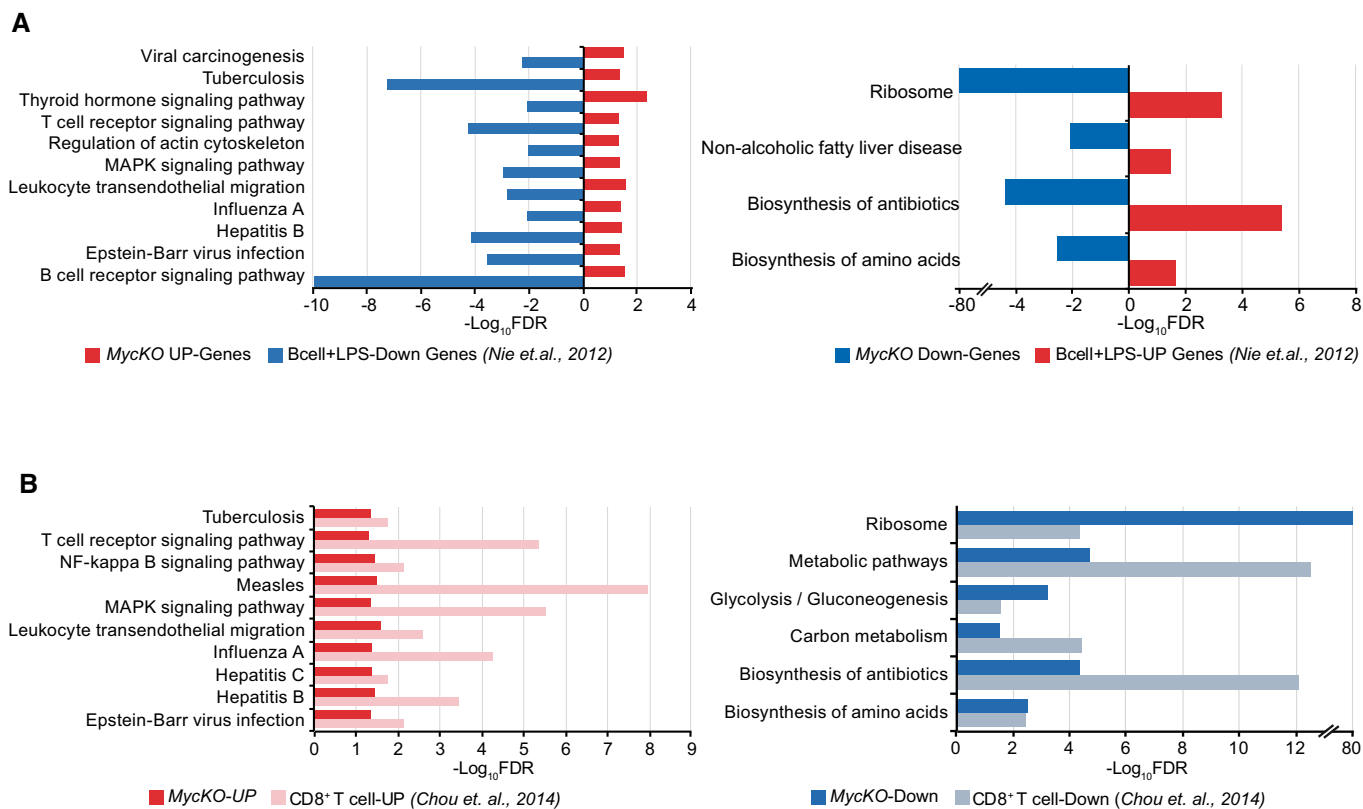

**Figure EV5. Comparison of *c-Myc* transcriptome.**

A, B Common KEGG pathways between primary normal B lymphocytes (A) [52] or primary CD8<sup>+</sup> T cells lacking *c-myc* (B) [53] and the findings of this study.
